# Supplementary material for: TLR4-mediated pyroptosis in human hepatoma-derived HuH-7 cells induced by a branched-chain polyunsaturated fatty acid, geranylgeranoic acid
Source: PubMed Central journal article supplement (PMC7189495; doi:10.1042/bsr20194118), 2020-04-28
Supplement: BSR-2019-4118_supp.pdf [file BSR-2019-4118_supp.pdf]

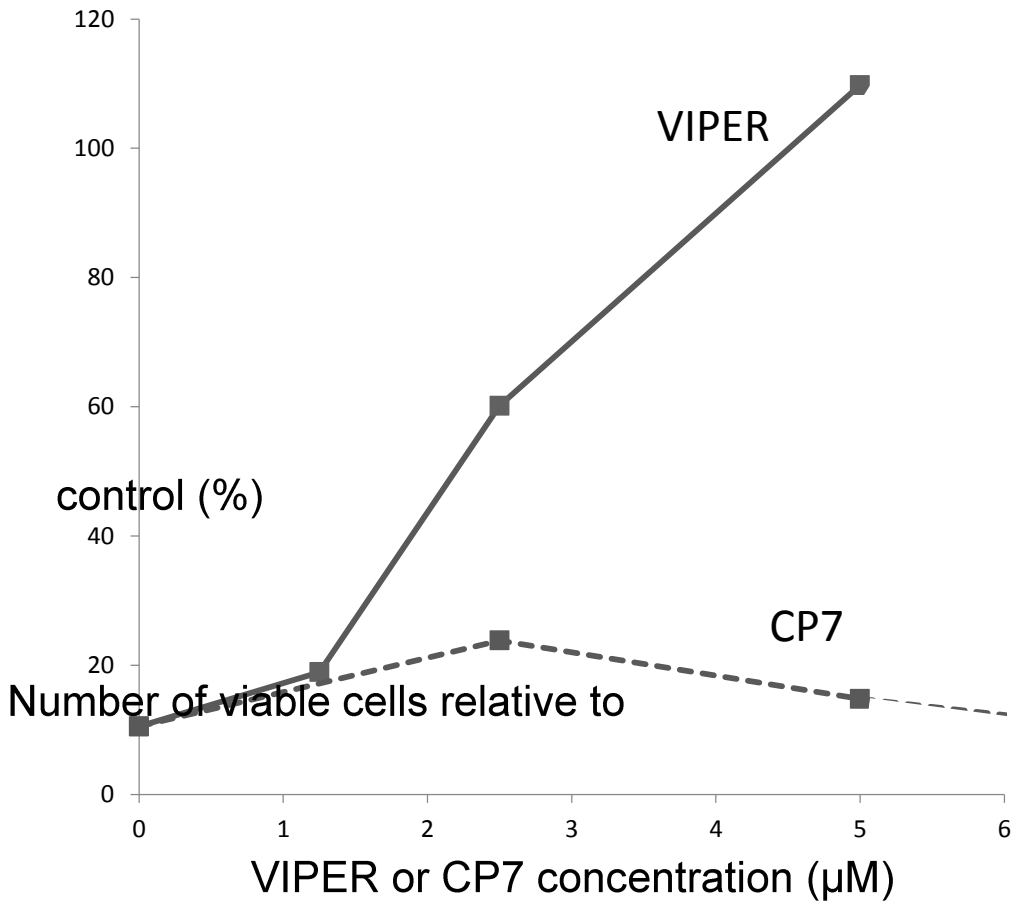

**Supplementary Figure S1. Dose-dependent inhibitory effect of VIPER on GGA-induced cell death.**

HuH-7 cells were treated with 20  $\mu\text{M}$  GGA for 24 h in the presence of 0, 1.25, 2.5 or 5  $\mu\text{M}$  VIPER (closed square and solid line) or CP7, control hepta-peptide (closed square and broken line).

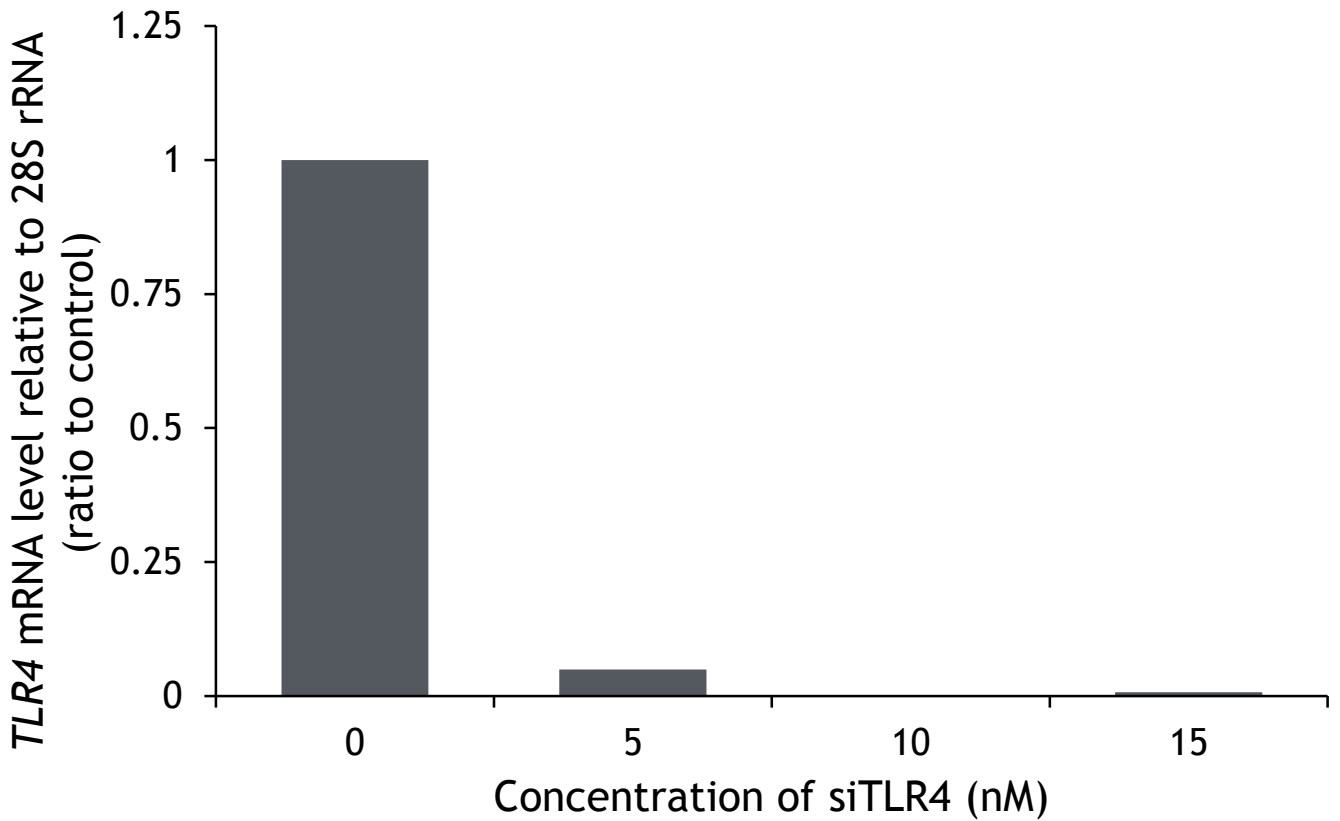

**Supplementary Figure S2. Knockdown of the *TLR4* gene expression with siTLR4.**

HuH-7 cells were treated with 5, 10, 15 nM *TLR4* siRNA (siTLR4) for 72 h. Total RNA was extracted to measure the cellular level of *TLR4* mRNAs by RT-qPCR.

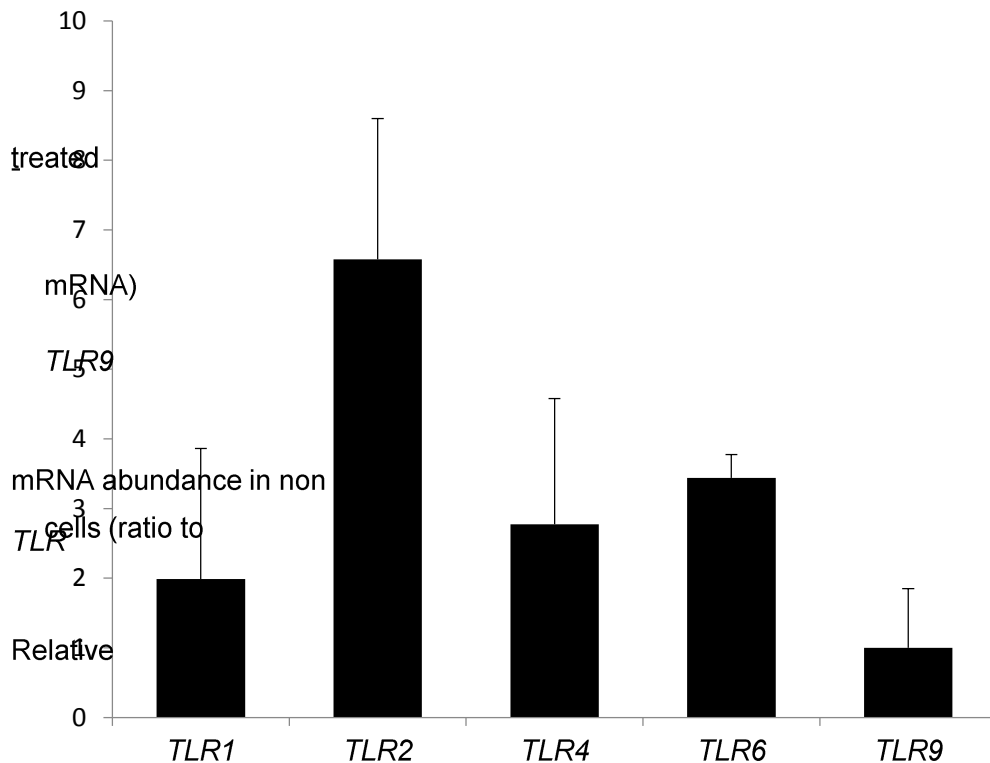

**Supplementary Figure S3. Relative TLR mRNAs abundance in control HuH-7 cells.**

Total RNA was extracted to measure the cellular levels of *TLR1*, 2, 4, 6 or 9 mRNA by RT-qPCR. The cellular baseline levels of *TLR* (1, 2, 4, 6 and 9) mRNAs were plotted relative to the level of *TLR9* mRNA in control HuH-7 cells. Values are the means  $\pm$  SD (n=3).

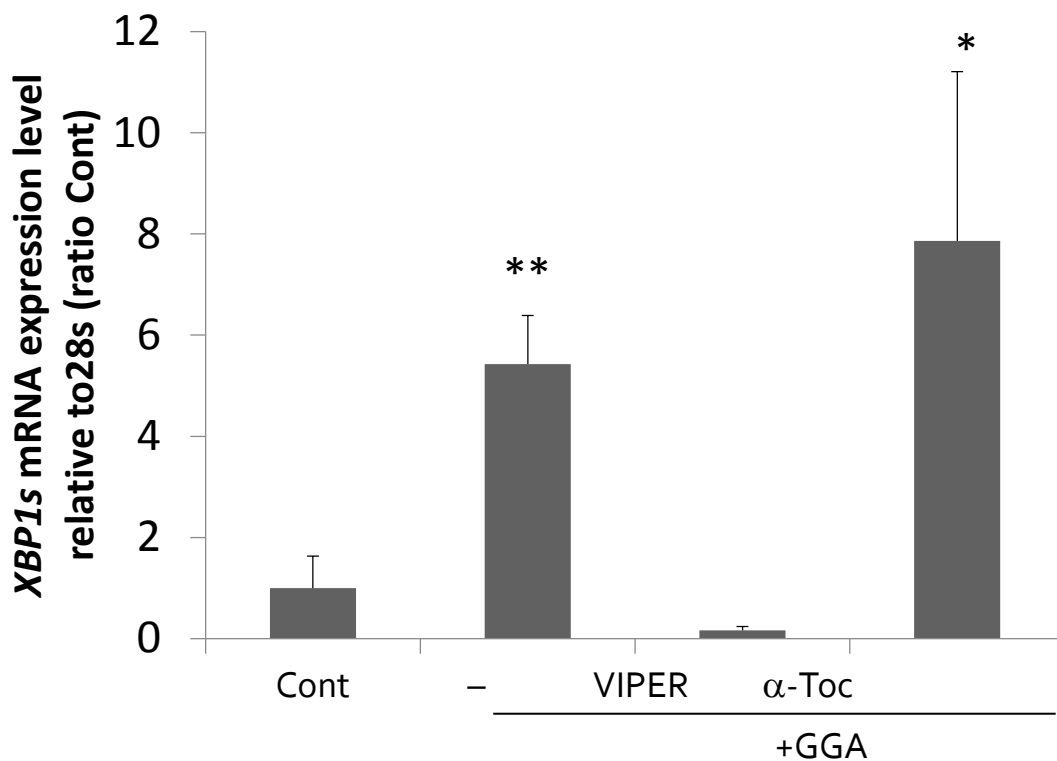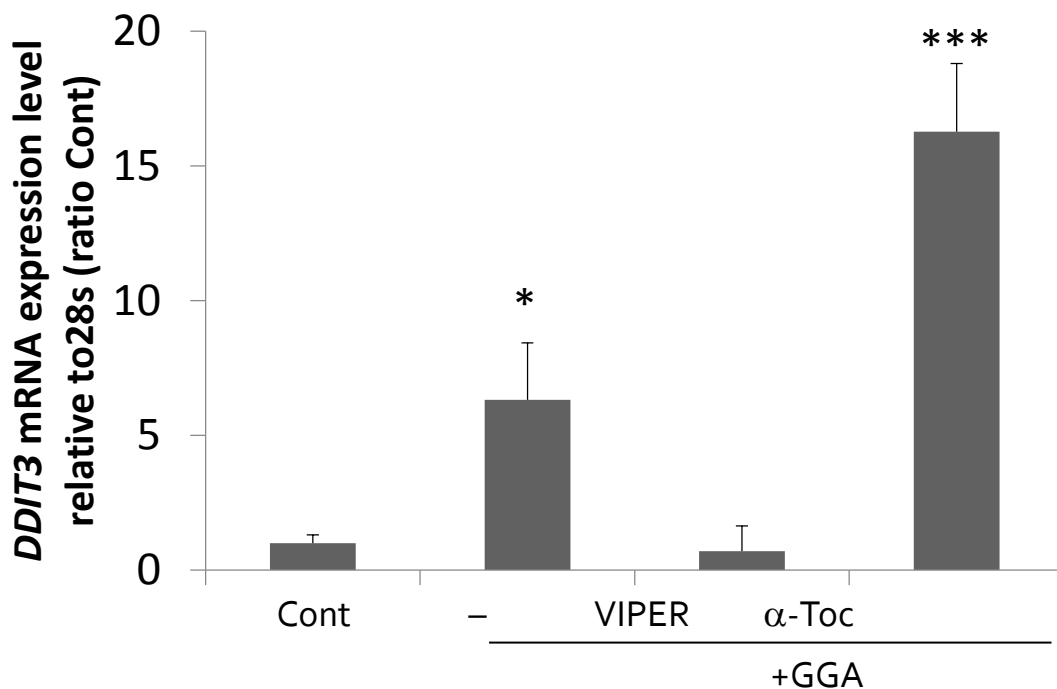

**Supplementary Figure S4. Effects of  $\alpha$ -tocopherol or VIPER on GGA-induced UPR.**

HuH-7 cells were treated with 20  $\mu$ M GGA for 3 h in the absence or presence of  $\alpha$ -tocopherol or VIPER (100 or 5  $\mu$ M, respectively). Total RNA was extracted to measure the cellular level of *XBP1s* or *DDIT3* mRNAs by RT-qPCR. \*, \*\*, \*\*\* indicate statistical significance ( $p < 0.05$ , 0.01, 0.001, respectively), compared with each relevant control as determined by Student's *t*-test.

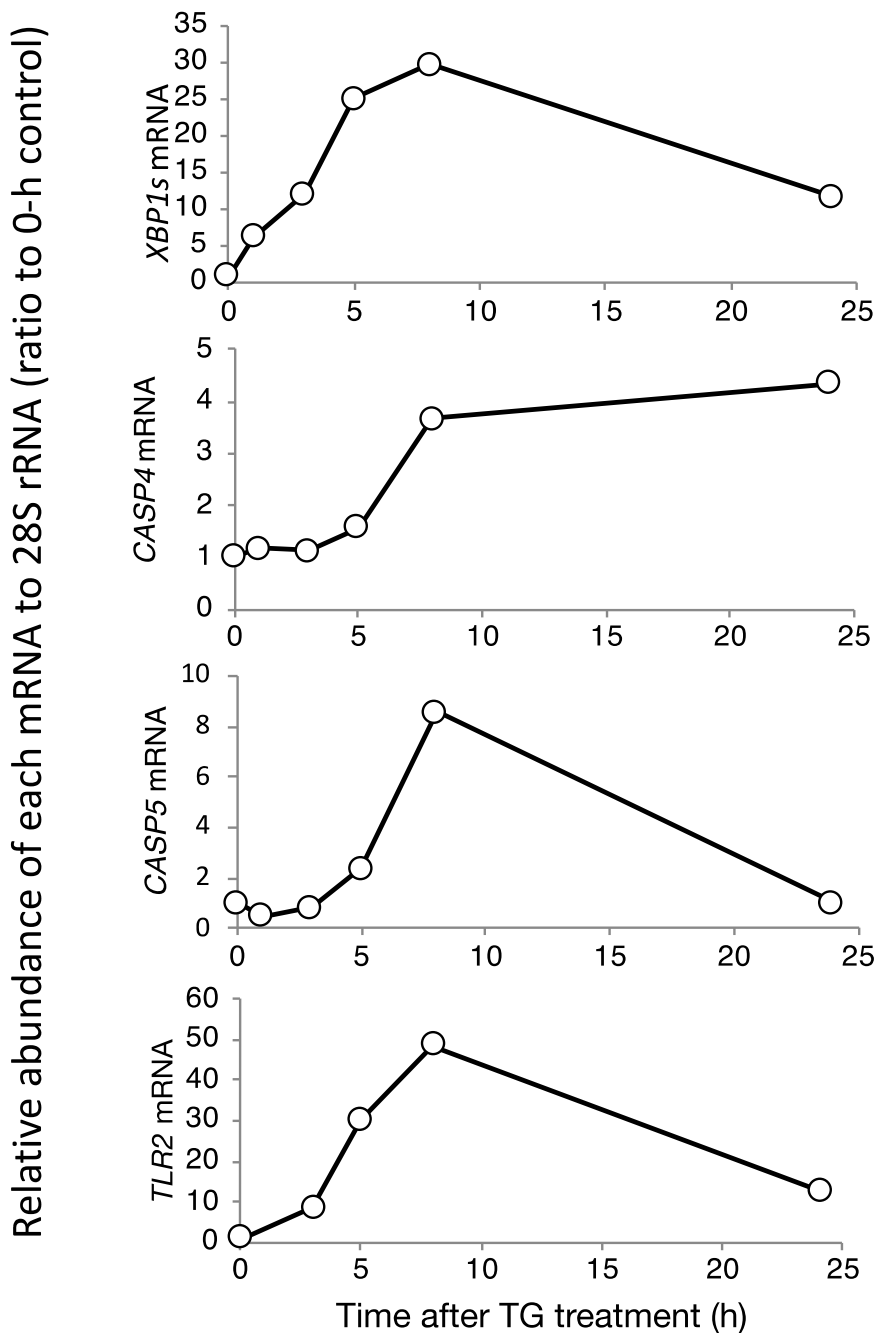

**Supplementary Figure S5. Thapsigargin (TG) induces upregulation of CASP4/5 and TLR2 mRNAs.**

HuH-7 cells were treated with 25 ng/mL TG, an inducer of UPR. Total RNA was extracted to measure the cellular level of *CASP4/5* or *TLR2* mRNAs by RT-qPCR.

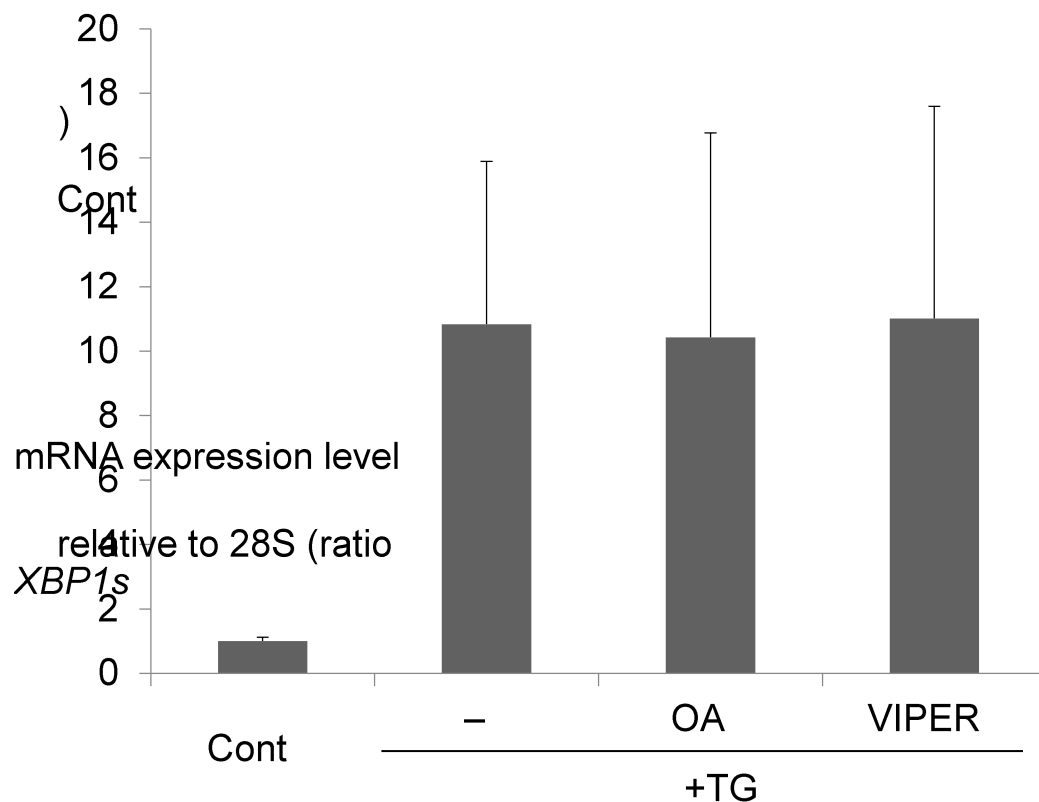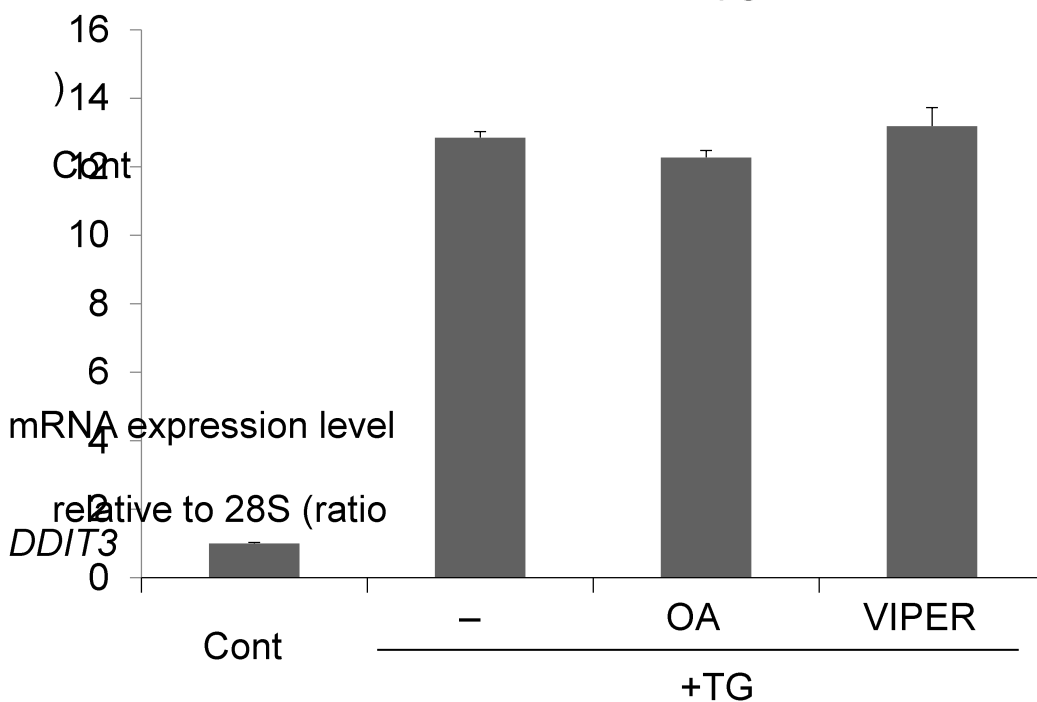

**Supplementary Figure S6. Effects of VIPER or oleic acid on thapsigargin-induced UPR.**

HuH-7 cells were treated with 25 ng/mL thapsigargin (TG) for 3 h in the absence or presence of OA or VIPER (50 or 5  $\mu$ M, respectively). Total RNA was extracted to measure the cellular level of *XBP1s* or *DDIT3* mRNA relative to internal 28S rRNA by RT-qPCR.

(A)

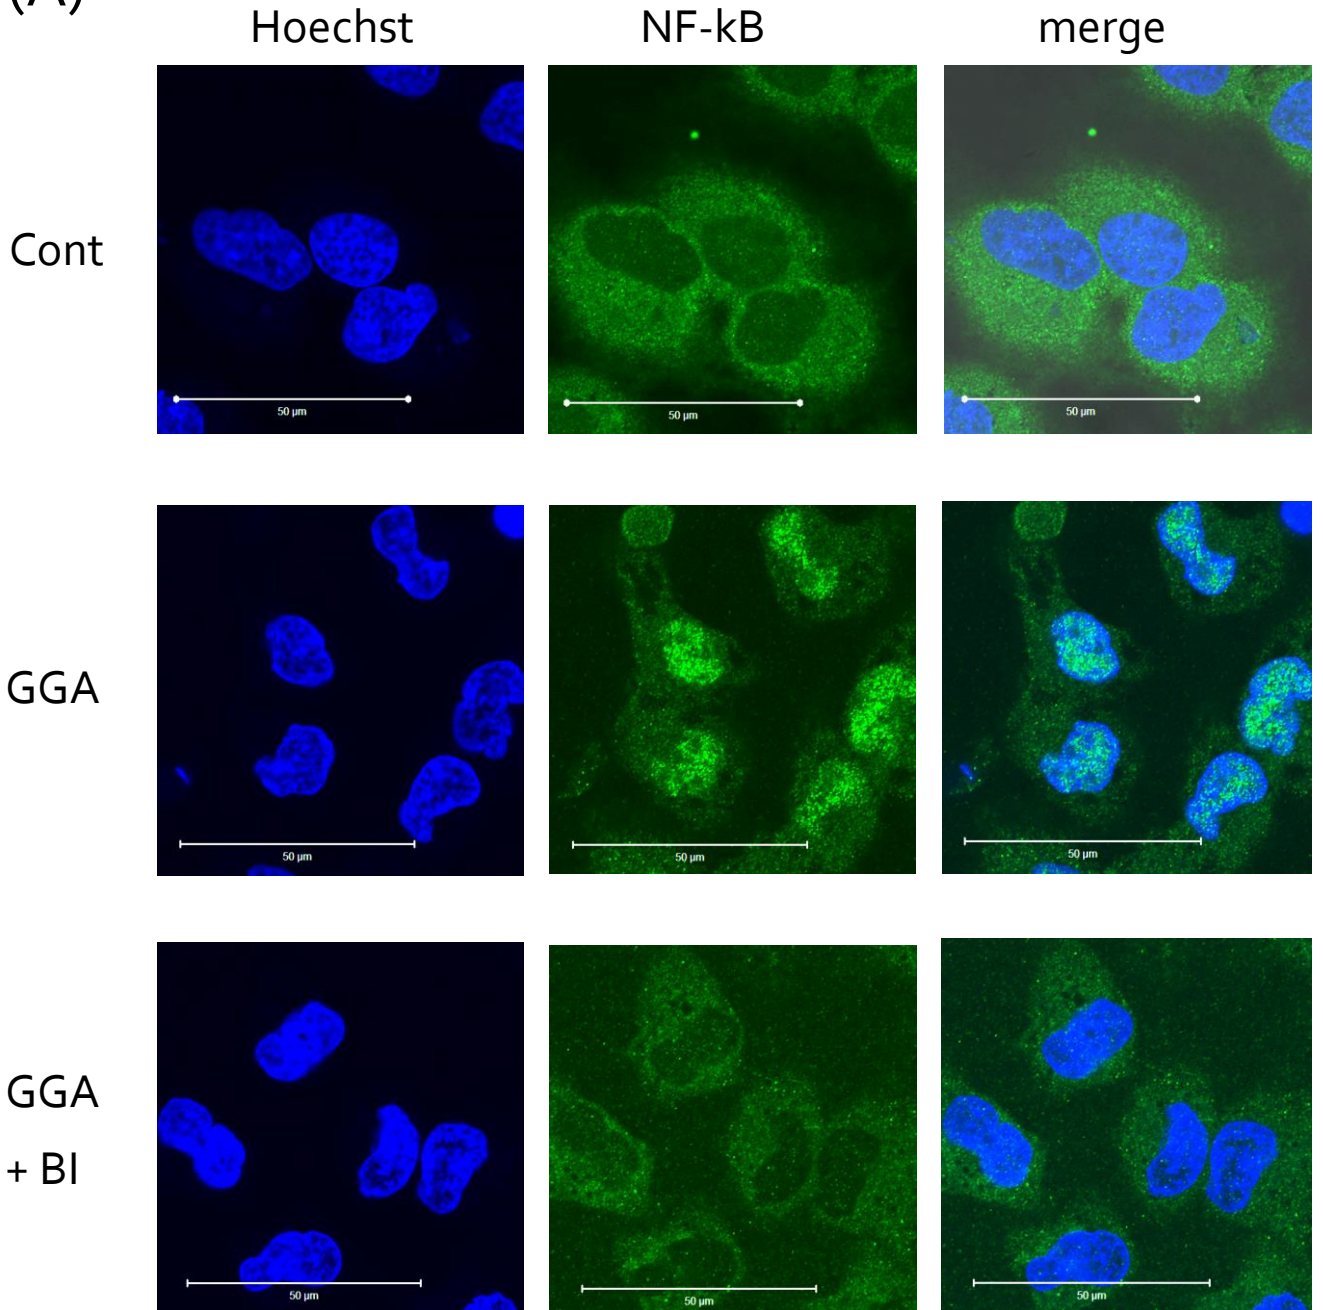

**Supplementary Figure S7. Effects of BI605906 on GGA-induced nuclear translocation of NF- $\kappa$ B protein.**

HuH-7 cells were treated with 20  $\mu$ M GGA for 3 h in the absence or presence of 5  $\mu$ M BI605906 (BI). Immunofluorescent images were obtained for NF- $\kappa$ B signals (green), and nuclei were counter-stained with Hoechst 33258 (Hoechst) after 3-h treatment. Objective lens x40 (A) and x20 (B).

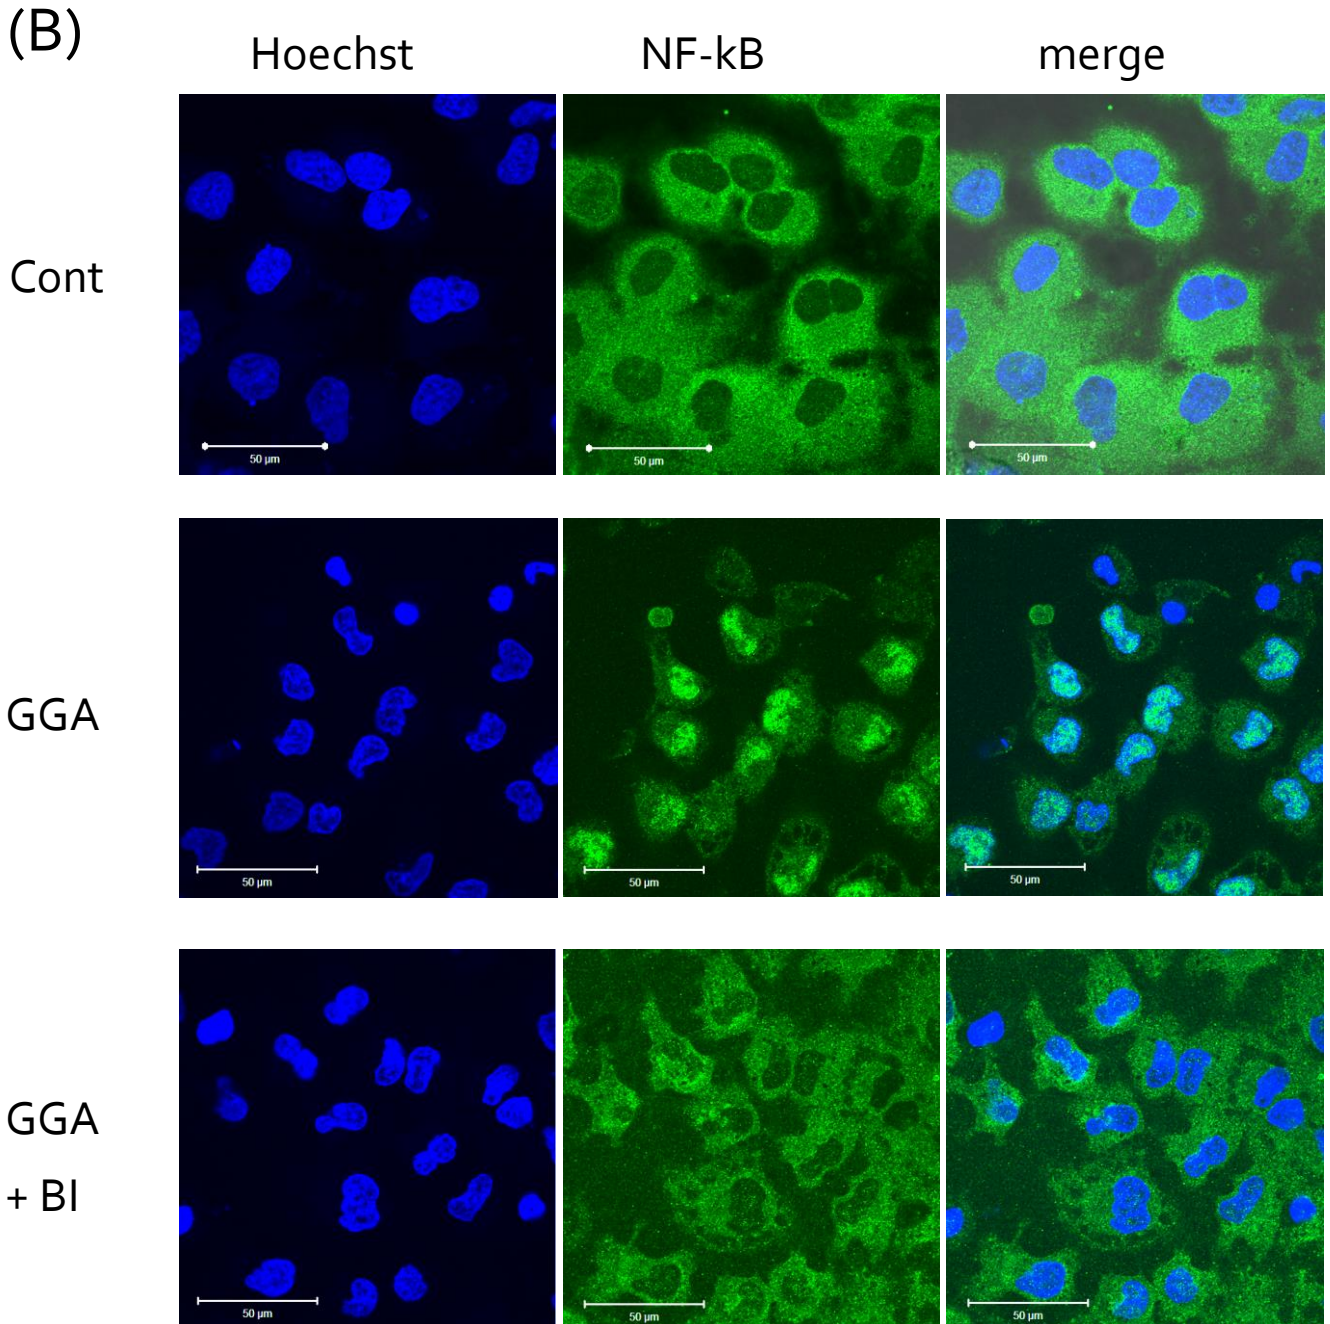

**Supplementary Figure S7. Effects of BI605906 on GGA-induced nuclear translocation of NF- $\kappa$ B protein.**

HuH-7 cells were treated with 20  $\mu$ M GGA for 3 h in the absence or presence of 5  $\mu$ M BI605906 (BI). Immunofluorescent images were obtained for NF- $\kappa$ B signals (green), and nuclei were counter-stained with Hoechst 33258 (Hoechst) after 3-h treatment. Objective lens x40 (A) and x20 (B).



**Supplementary Table S1. Primer List for RT-qPCR**

| <b>Genes</b>    | <b>Primer</b> | <b>Sequence (5'-3')</b>    |
|-----------------|---------------|----------------------------|
| <i>CASP4</i>    | F             | TTGCTTTCTGCTCTTCAACG       |
|                 | R             | GTGTGATGAAGATAGAGCCCATT    |
| <i>CASP5</i>    | F             | GTCTAAAGGACAAACCCAAGG      |
|                 | R             | TGTGAAGAGATGAGTGCCAAG      |
| <i>NLRP3</i>    | F             | GTGTTTCGAATCCCCTGTG        |
|                 | R             | TGTGCTTCTCACGTACTTTCTG     |
| <i>IL1B</i>     | F             | CCACAGACCTTCCAGGAGAA       |
|                 | R             | GTGATCGTACAGGTGCATCG       |
| <i>XBP1s</i>    | F             | TGCTGAGTCCGCAGCAGGTG       |
|                 | R             | GCTGGCAGGCTCTGGGGAAG       |
| <i>DDIT3</i>    | F             | ATGGCAGCTGAGTCATTGCCTTTC   |
|                 | R             | AGAAGCAGGGTCAAGAGTGGTGAA   |
| <i>TLR1</i>     | F             | CCTAGCAGTTATCACAAGCTCAAA   |
|                 | R             | TCTTTTCCTTGGGCCATTC        |
| <i>TLR2</i>     | F             | CGTTCTCTCAGGTGACTGCTC      |
|                 | R             | TCTCCTTTGGATCCTGCTTG       |
| <i>TLR4</i>     | F             | CTGCCACATGTCAGGCCTTAT      |
|                 | R             | AATGCCACCTGGAAGACTCT       |
| <i>TLR6</i>     | F             | TGAAACAGTCTCTTTTGAGTAAATGC |
|                 | R             | CAGAATCCATTTGGGAAAGC       |
| <i>TLR9</i>     | F             | CCAGACCCTCTGGAGAAGC        |
|                 | R             | GTAGGAAGGCAGGCAAGGT        |
| <i>28S rRNA</i> | F             | TTAGTGACGCGCATGAATGG       |
|                 | R             | TGTGGTTTCGCTGGATAGTAGGT    |
